# Supplementary material for: Interaction Driven Giant Electrostatic Modulation of Ion Permeation in Atomically Small Capillaries
Source: Research Square preprint supplement (doi:10.21203/rs.3.rs-4376877/v1), 2025-05-05
Supplement: Supplementary file 1 [file cba7f176604ce9d745dbcfcc.xlsx]

## Sheet: Fig. 1c
	K-V, O 1s								Ca-V, O 1s								Al-V, O 1s
	Binding energy (eV)	Raw Intensity (a.u.)	Si-O-Si(Al)/Si-O-Mg peak intensity (a.u.)	OH peak intensity (a.u.)	Background intensity (a.u.)	Envelop intensity (a.u)			Binding energy (eV)	Raw Intensity (a.u.)	Si-O-Si(Al)/Si-O-Mg peak intensity (a.u.)	OH peak intensity (a.u.)	Background intensity (a.u.)	Envelop intensity (a.u)			Binding energy (eV)	Raw Intensity (a.u)	Si-O-Si(Al)/Si-O-Mg peak intensity (a.u.)	OH peak intensity (a.u.)	Background intensity (a.u.)	Envelop intensity (a.u)
	538	27268.2	27836.4	27729.2	27268.2	28297.4			538	23689.2	24056.3	23719.7	23689.2	24086.9			538	24930.1	24932.2	25034.7	24930.1	25036.8
	537.9	27246.4	27832.1	27726	27246.4	28311.7			537.9	23584.9	23963.5	23622.4	23584.9	24000.9			537.9	24713.3	24715.6	24846.8	24713.3	24849.1
	537.8	27369.8	27973.9	27869.2	27369.8	28473.4			537.8	23367	23842.6	23498.5	23452.1	23889			537.8	24875.9	24797	24963.7	24794.6	24966.1
	537.7	27369.2	27992.6	27889.8	27369.2	28513.2			537.7	23404.6	23855.2	23509.8	23452.1	23912.8			537.7	24794.6	24797.2	25007	24794.6	25009.6
	537.6	26810.3	27453.9	27353.6	26810.3	27997.2			537.6	23389.3	23868.3	23523.1	23452.1	23939.3			537.6	24910.8	24797.3	25061.6	24794.5	25064.4
	537.5	26913.9	27578.7	27481.4	26913.9	28146.2			537.5	23224.6	23882.1	23540.1	23452	23970.2			537.5	24935.1	24797.5	25131.7	24794.5	25134.7
	537.4	27206.9	27894	27800.5	27206.9	28487.5			537.4	23189.1	23896.5	23561.8	23451.9	24006.4			537.4	24981.8	24797.6	25216.4	24794.4	25219.7
	537.3	26932	27646.5	27557.5	26935.9	28268.1			537.3	23563.4	23911.8	23587.6	23451.8	24047.6			537.3	25012.8	24797.8	25317.5	24794.3	25321
	537.2	26668.7	27671.1	27587.6	26935.7	28323			537.2	23371.8	23927.9	23619.8	23451.8	24095.9			537.2	25320.7	24797.9	25443.4	24794.1	25447.2
	537.1	26747.3	27697.1	27620.2	26935.7	28381.7			537.1	23617.8	23944.8	23661.1	23451.7	24154.1			537.1	25328.7	24798	25599.5	24793.9	25603.7
	537	26889.4	27724.6	27655.7	26935.6	28444.7			537	23654.7	23962.7	23709.4	23451.7	24220.5			537	25761.2	24798	25783.9	24793.5	25788.4
	536.9	27272.5	27753.4	27694.4	26935.5	28512.3			536.9	23494.7	23981.7	23768.5	23451.6	24298.5			536.9	25999.2	24797.9	25999.5	24793	26004.4
	536.8	27515.1	27783.9	27736.6	26935.2	28585.4			536.8	23835.2	24001.5	23843.7	23451.5	24393.7			536.8	26259.3	24797.8	26263.3	24792.5	26268.7
	536.7	27058.4	27816.5	27783.5	26935.1	28664.8			536.7	23875.5	24022.7	23931.1	23451.3	24502.5			536.7	26638.7	24797.6	26579.2	24791.7	26585.1
	536.6	26936	27851.1	27835.7	26935.1	28751.6			536.6	23909.7	24045	24035.1	23451.1	24629			536.6	27265.3	24797.2	26943.7	24790.8	26950.1
	536.5	27094.8	27887.6	27894.1	26935.1	28846.7			536.5	24643.6	24068.4	24166.7	23450.6	24784.4			536.5	27501.8	24796.8	27360.7	24789.7	27367.8
	536.4	27142.7	27926.4	27959.5	26935	28951			536.4	24528.3	24093.5	24318.1	23450.2	24961.4			536.4	28050.4	24796.3	27859.6	24788.4	27867.5
	536.3	27810.9	27967.5	28032.9	26934.6	29065.8			536.3	24928	24120	24493.9	23449.6	25164.3			536.3	28366.5	24795.7	28436.5	24787	28445.2
	536.2	27759.9	28011.4	28116.2	26934.2	29193.5			536.2	25336.4	24148	24714.5	23448.8	25413.7			536.2	29017.1	24795.1	29086.3	24785.3	29096
	536.1	27748.5	28058.4	28211.5	26933.8	29336.1			536.1	25765.3	24177.9	24965.4	23447.8	25695.5			536.1	29844.5	24794.2	29812.6	24783.3	29823.5
	536	28035.6	28108.4	28320.9	26933.3	29496.1			536	25966	24209.9	25250.2	23446.8	26013.4			536	30657.9	24793.3	30657.9	24781	30670.2
	535.9	28431.3	28161.8	28447.5	26932.6	29676.8			535.9	26064.6	24244.1	25603.7	23445.7	26402.1			535.9	31548.7	24792.3	31601.9	24778.4	31615.8
	535.8	28754.2	28218.9	28595	26931.7	29882.2			535.8	26561.8	24280.9	26000.6	23444.4	26837			535.8	32573	24791.2	32638.1	24775.3	32654
	535.7	28935.5	28280.9	28767.6	26930.8	30117.7			535.7	27233.9	24320.2	26441.5	23442.8	27318.9			535.7	33673.1	24790.2	33768.6	24771.8	33787
	535.6	29317.9	28347.5	28970.6	26929.7	30388.4			535.6	27713.5	24362.4	26980.4	23441.1	27901.7			535.6	35041.7	24789.4	35041.3	24767.7	35063
	535.5	30130.1	28419.1	29209.8	26928.2	30700.7			535.5	28643.8	24407.8	27577.5	23438.9	28546.4			535.5	36472.7	24789.4	36414.4	24763.1	36440.7
	535.4	30856.3	28496.3	29492.5	26926.4	31062.4			535.4	29371.9	24457	28233.4	23436.5	29254			535.4	37990	24791	37880.8	24757.9	37914
	535.3	31110.6	28580.1	29827.1	26924.4	31482.9			535.3	30374.3	24510	29009.1	23433.6	30085.5			535.3	39351	24796.7	39438.6	24752.2	39483.1
	535.2	31736.1	28672	30223.1	26922.2	31972.9			535.2	31379.5	24567.6	29862.3	23430.3	30999.5			535.2	41396.8	24808.4	41123.2	24745.6	41186
	535.1	32617.3	28772.5	30690.9	26919.5	32543.9			535.1	32245.7	24630.8	30788	23426.7	31992.1			535.1	42644.8	24827.5	42878.7	24738.6	42967.6
	535	33329.1	28882.8	31242.4	26916.5	33208.7			535	33154.2	24699.7	31848.9	23422.7	33125.9			535	44676.4	24855.1	44696.9	24730.7	44821.3
	534.9	33767.2	29004.4	31890.7	26913.3	33981.9			534.9	34297.9	24775.3	33004.3	23418.2	34361.4			534.9	46639.1	24896	46571.6	24722.1	46745.5
	534.8	35656.9	29138.7	32648.8	26909.2	34878.2			534.8	35507.5	24859.6	34241	23413.2	35687.5			534.8	48560.5	24956.6	48495.6	24712.7	48739.4
	534.7	36962.8	29289.2	33531	26904.5	35915.7			534.7	37291.3	24952.6	35615.8	23407.4	37161			534.7	51069.7	25047.5	50429	24702.3	50774.1
	534.6	38181.8	29460.9	34552	26899.3	37113.6			534.6	38695.2	25056	37093.4	23401.1	38748.3			534.6	52936.7	25180.3	52359	24691.2	52848.1
	534.5	39903.4	29656.3	35725.2	26893.2	38488.3			534.5	40728.7	25174.3	38651.6	23393.9	40432			534.5	54838.3	25370.4	54267.9	24679.3	54958.9
	534.4	41476.4	29880.2	37063.9	26886.4	40057.7			534.4	42730.9	25308.1	40334.1	23386	42256.2			534.4	57808.8	25637.8	56106.4	24666.3	57078
	534.3	43295.7	30138.4	38584.7	26878.7	41844.4			534.3	44557.3	25461.3	42111.9	23377.2	44196.1			534.3	59581.3	26009.3	57867.8	24652.5	59224.6
	534.2	45532.7	30438.6	40293.8	26870	43862.4			534.2	46527.3	25643.4	43956.6	23367.6	46232.3			534.2	61250.8	26518.1	59537.3	24638.1	61417.3
	534.1	47405.4	30800.3	42192.6	26860.4	46132.4			534.1	48522.1	25856.4	45892.3	23357.2	48391.5			534.1	63327.6	27204.7	61079.4	24622.9	63661.2
	534	49616.8	31231.9	44280.8	26849.8	48662.9			534	50504.4	26107.4	47894	23346	50655.4			534	66177.5	28118.4	62428.1	24606.5	65940
	533.9	52115.1	31751.2	46552.5	26838	51465.8			533.9	52746.8	26415.1	49932.9	23333.9	53014.1			533.9	68093.6	29318.2	63614	24589.4	68342.8
	533.8	54974.8	32380.2	48995.9	26824.8	54551.2			533.8	55126.6	26790.9	52011.8	23320.7	55482			533.8	70669.5	30871.9	64625.9	24571.3	70926.5
	533.7	58017.2	33146.3	51592.2	26810.3	57928.2			533.7	58045.1	27249.8	54101.5	23306.4	58045			533.7	73728.1	32856.2	65411.9	24551.9	73716.1
	533.6	61288.6	34100.2	54315.6	26794.2	61621.7			533.6	60595.6	27830.1	56184.1	23290.9	60723.2			533.6	76380.1	35355.8	65925.3	24531.5	76749.5
	533.5	64871	35285.8	57133.3	26776.4	65642.6			533.5	63879	28562.9	58244.1	23274.2	63532.8			533.5	80151.1	38488.9	66224.5	24509.6	80203.9
	533.4	68728.3	36742.7	60005.3	26756.8	69991.3			533.4	66381.3	29476.5	60236.8	23256.3	66457			533.4	84243.8	42349.2	66306.4	24486.1	84169.5
	533.3	73601.2	38528.1	62885.5	26734.9	74678.7			533.3	69739.2	30638.5	62168.5	23237.1	69569.9			533.3	88892.7	47007	66114.7	24460.7	88661
	533.2	78591.1	40706.3	65722.8	26710.7	79718.4			533.2	72673.2	32121	64013.8	23216.7	72918.2			533.2	94231.5	52542.1	65646.2	24433.2	93755.1
	533.1	83692.6	43364.5	68462.1	26684.1	85142.5			533.1	76253	33959.9	65698.9	23194.8	76464.1			533.1	99525.5	59018.5	64968.8	24403.6	99583.6
	533	89927	46629.5	71046	26654.6	91020.9			533	80519.7	36251.2	67268.3	23171.1	80348.4			533	106028	66476.6	64088.1	24371.5	106193
	532.9	96522.7	50526.7	73417	26622	97321.7			532.9	84596.9	39125.6	68696.6	23145.7	84676.6			532.9	113354	74926.8	62961.4	24336.5	113552
	532.8	103519	55128.6	75519.3	26586	104062			532.8	89775	42595.1	69872.3	23118.1	89349.4			532.8	121664	84341.3	61627.4	24298.1	121671
	532.7	111027	60498.9	77301.3	26546.6	111254			532.7	94123.6	46748.7	70887.7	23088.8	94547.6			532.7	130262	94649.2	60142.7	24256.4	130535
	532.6	119253	66687	78717.2	26503.3	118901			532.6	100394	51759.1	71726.4	23056.8	100429			532.6	140605	105730	58519.6	24210.6	140040
	532.5	127561	73820.3	79729.4	26456.1	127094			532.5	106927	57546.3	72239	23022.1	106763			532.5	150242	117416	56744.4	24161	149999
	532.4	136585	81810.8	80309.7	26404.7	135716			532.4	113867	64120.3	72564.6	22984.6	113700			532.4	161020	129486	54871	24107.1	160250
	532.3	145806	90596.8	80440.9	26348.9	144689			532.3	120743	71593.2	72702.6	22944.2	121352			532.3	170538	141672	52934.7	24049.4	170557
	532.2	156390	100092	80117	26288.2	153921			532.2	128578	79740	72479.1	22900.5	129319			532.2	179835	153638	50950.1	23988	180600
	532.1	164781	110168	79345.3	26223.5	163290			532.1	137459	88434.6	72065.7	22853.1	137647			532.1	189599	165047	48935.9	23922.8	190060
	532	173203	120663	78130.5	26154.9	172639			532	145764	97536.1	71465	22802.3	146199			532	197824	175558	46928.8	23854.3	198633
	531.9	182318	131314	76512.7	26082	181744			531.9	155000	106738	70539.6	22747.7	154530			531.9	205310	184837	44942.8	23782.9	205996
	531.8	190692	141829	74537.7	26005.1	190362			531.8	162645	115766	69434.6	22689.8	162510			531.8	212007	192571	42989.8	23708.8	211852
	531.7	197688	151919	72253.6	25924.9	198247			531.7	170240	124233	68168.2	22628.9	169772			531.7	216686	198493	41113.9	23632.8	215974
	531.6	203811	161278	69713.4	25841.9	205150			531.6	176477	131812	66650.9	22565.3	175898			531.6	218575	202389	39314.4	23556	218147
	531.5	209215	169582	66973.7	25756.2	210800			531.5	181094	138250	64990.4	22499.7	180741			531.5	218004	204115	37593.4	23479.4	218229
	531.4	214598	176368	64092.2	25668.1	214792			531.4	183950	143125	63215.1	22433	183908			531.4	216496	203605	35956.9	23403.4	216159
	531.3	215879	181525	61127.5	25579.2	217073			531.3	185265	146195	61282.1	22365.7	185111			531.3	212199	200874	34459.2	23329.1	212004
	531.2	216936	184863	58133.7	25489.9	217507			531.2	184617	147465	59263.1	22298.6	184430			531.2	206002	196016	33063.2	23257.1	205822
	531.1	215606	186253	55162	25401.1	216014			531.1	181808	146749	57185.9	22232.6	181702			531.1	197912	189187	31766.9	23188.4	197765
	531	212357	185638	52257.6	25313.8	212582			531	176199	143985	55045.5	22169	176861			531	188121	180555	30572.8	23123.4	188004
	530.9	207097	182842	49459.6	25228.9	207072			530.9	170482	139522	52886	22107.7	170301			530.9	177519	170533	29525.5	23062.6	176996
	530.8	200175	178113	46799.6	25147.2	199765			530.8	161637	133495	50724.4	22050	162169			530.8	165582	159449	28573	23006.5	165015
	530.7	191395	171698	44302.7	25069.6	190931			530.7	152211	126051	48578.4	21996.2	152633			530.7	151667	147643	27713.1	22955.8	152400
	530.6	182279	163827	41985.7	24996.2	180816			530.6	142084	117698	46478.3	21946.5	142230			530.6	139443	135453	26947.2	22909.9	139490
	530.5	169499	154772	39860.9	24928.7	169705			530.5	131454	108731	44420.8	21901.3	131250			530.5	127168	123200	26297.3	22868.9	126628
	530.4	158391	144802	37931.8	24866.4	157868			530.4	119906	99444.6	42434.1	21860.8	120018			530.4	113316	111175	25721.3	22833.3	114063
	530.3	147099	134254	36197.5	24809.3	145642			530.3	108817	90203.2	40544.9	21824.8	108923			530.3	101539	99626.3	25214.6	22802.3	102039
	530.2	133612	123496	34653.9	24758.5	133391			530.2	98473.3	81240.6	38727.7	21793.1	98175.2			530.2	90121.8	88756.6	24778.8	22775.8	90759.7
	530.1	121662	112800	33291.6	24713.2	121378			530.1	87136.9	72859.7	37010.3	21766.1	88103.9			530.1	79257.7	78717.9	24419.8	22753.5	80384.2
	530	110062	102406	32099.2	24673.4	109832			530	78805	65144.3	35422.5	21742.5	78824.2			530	70153.7	69611.9	24108.9	22734.8	70985.9
	529.9	98817.4	92514.1	31063.4	24638.8	98938.8			529.9	70980.7	58170.2	33919.5	21722.2	70367.5			529.9	61936.7	61493.6	23842.2	22719.4	62616.4
	529.8	88936.6	83382.4	30169.7	24608.7	88943.4			529.8	62894.5	52096.5	32522	21705.2	62913.3			529.8	55176.2	54437.8	23620.6	22706.6	55351.7
	529.7	79385.4	75034.6	29407.4	24583.1	79858.9			529.7	56889.5	46848.5	31266.9	21690.6	56424.8			529.7	49288.4	48359.9	23442.1	22696.2	49105.8
	529.6	71004.7	67525.4	28757.7	24561.5	71721.6			529.6	52006.6	42354.9	30095.8	21678.1	50772.6			529.6	44241	43198.9	23290.8	22687.7	43802
	529.5	64195.1	60872.2	28204.9	24543	64534.2			529.5	47107.1	38636.5	29020.4	21667.6	45989.3			529.5	40135.6	38881.1	23163.9	22680.8	39364.2
	529.4	58122	55061.3	27736.2	24527.3	58270.3			529.4	42759.6	35586.7	28083.4	21658.8	42011.3			529.4	36953.2	35320.9	23061.9	22675.2	35707.7
	529.3	52836	50118.4	27339.7	24514.1	52944			529.3	39477.5	33076.8	27220.7	21651.5	38646			529.3	34072.6	32427.3	22981.3	22670.7	32737.8
	529.2	48421.3	45945.3	27004.4	24502.9	48446.8			529.2	36489.7	31065.4	26436.1	21645.3	35856.1			529.2	31654.6	30108.2	22914.2	22667.2	30355.3
	529.1	44446.4	42431.9	26721	24493.6	44659.3			529.1	33785.8	29475.2	25773.7	21640.3	33608.6			529.1	29931.1	28275.2	22859.2	22664.3	28470.1
	529	41989	39501.7	26480.8	24485.4	41497			529	31584.6	28194.2	25171.3	21636.2	31729.3			529	28405.2	26846	22816.3	22662	27000.3
	528.9	39151.3	37078.6	26277	24478.6	38877.1			528.9	29700	27177.3	24628	21632.9	30172.4			528.9	26862.5	25746.6	22783	22660.4	25869.2
	528.8	36271.4	35102.3	26103.8	24473.1	36733			528.8	28154	26384.1	24182.8	21630.2	28936.7			528.8	26257.8	24911.9	22755.6	22659	25008.6
	528.7	34234.7	33517.5	25955.8	24468.5	35004.8			528.7	26902.3	25743.6	23783.1	21628	27898.7			528.7	25410.9	24286.4	22733.6	22657.9	24362.1
	528.6	32655.2	32223.1	25828.6	24464.7	33587			528.6	26127.6	25226.7	23427.3	21626.1	27027.9			528.6	24621	23829.6	22717	22657.1	23889.5
	528.5	31236.5	31167	25718.7	24461.5	32424.3			528.5	25109.5	24817.6	23140	21624.7	26332.9			528.5	24021.7	23496.8	22704.1	22656.6	23544.4
	528.4	30020.7	30304.9	25623.2	24458.9	31469.2			528.4	24263.9	24478.8	22887.6	21623.6	25742.8			528.4	23780.5	23255	22693.7	22656.1	23292.6
	528.3	28917	29599.1	25539.6	24456.8	30681.9			528.3	23832.8	24195.4	22665.6	21622.7	25238.3			528.3	23626.8	23081	22685.3	22655.7	23110.6
	528.2	28508.5	29030.6	25465.8	24454.9	30041.4			528.2	23621.3	23962.4	22488.4	21621.9	24828.9			528.2	23466.6	22957	22679	22655.4	22980.6
	528.1	27842	28558.9	25400.2	24453.4	29505.8			528.1	23485.3	23762.2	22336.1	21621.1	24477.2			528.1	23133	22869.3	22673.9	22655.2	22888
	528	27034.9	28163.4	25341.9	24452.2	29053.1			528	23081.4	23589.3	22203.7	21620.5	24172.5			528	22900.2	22807.5	22669.8	22655.1	22822.2
	527.9	26524	27828.8	25289.7	24451.2	28667.2			527.9	22722.6	23441.8	22099	21620	23920.8			527.9	23069.9	22763.7	22666.4	22655	22775.1
	527.8	26514.1	27542.6	25242.6	24450.2	28334.9			527.8	22291	23312.3	22011.4	21619.8	23703.9			527.8	22927.9	22732	22664	22654.9	22741.2
	527.7	26398.2	27297.7	25199.8	24449.3	28048.2			527.7	22366.5	23196.9	21935.9	21619.5	23513.3			527.7	22471.2	22708.8	22662.4	22654.8	22716.4
	527.6	25971.3	27086.2	25160.9	24448.6	27798.5			527.6	22155.2	23094.7	21876.6	21619.2	23352.1			527.6	22565.3	22604	22571.7	22565.3	22610.4
	527.5	25833	26900.7	25125.3	24448	27578			527.5	22210.7	23003	21828	21619	23212			527.5	22823.4	22853	22829	22823.4	22858.5
	527.4	25704.8	26736.8	25092.5	24447.4	27381.9			527.4	22368.9	22919.5	21786.5	21618.7	23087.3			527.4	22688.4	22712.4	22693.3	22688.4	22717.3
	527.3	25552.1	26590.6	25062.3	24446.9	27206			527.3	22161.8	22844.1	21754	21618.5	22979.6			527.3	22382.8	22403	22387.2	22382.8	22407.4
	527.2	25488	26459.4	25034.3	24446.4	27047.3			527.2	21793.9	22775.8	21728.1	21618.4	22885.5			527.2	22256.9	22274.2	22260.9	22256.9	22278.2
	527.1	25466.8	26342	25008.2	24445.9	26904.3			527.1	21887.7	22712.9	21706.2	21618.3	22800.8			527.1	22108.9	22123.9	22112.5	22108.9	22127.5
	527	25094.2	26235.2	24984	24445.6	26773.6			527	21797	22655.3	21689.1	21618.2	22726.1			527	22218.1	22231.3	22221.4	22218.1	22234.6
	526.9	25092.7	26137.6	24961.4	24445.3	26653.6			526.9	21899.4	22602.5	21675.6	21618.1	22660			526.9	22018.3	22030	22021.3	22018.3	22033
	526.8	25369.7	26047.9	24940	24444.9	26543			526.8	21791.2	22553.6	21664.3	21618	22599.9			526.8	22059	22069.4	22061.8	22059	22072.2
	526.7	25493.6	25965.2	24920	24444.4	26440.8			526.7	21684.9	22508.4	21655.4	21618	22545.8			526.7	21937.6	21946.9	21940.1	21937.6	21949.4
	526.6	25365.5	25889.6	24901.2	24443.9	26346.8			526.6	21567.2	22466.7	21648.5	21618	22497.2			526.6	22061.4	22069.8	22063.8	22061.4	22072.1
	526.5	25085.7	25819.8	24883.6	24443.6	26259.8			526.5	21479.7	22427.8	21642.5	21617.9	22452.4			526.5	22147.1	22154.6	22149.3	22147.1	22156.8
	526.4	24577.9	25755.3	24867.2	24443.6	26178.9			526.4	21641.2	22391.5	21637.6	21617.9	22411.2			526.4	22252.4	22259.2	22254.4	22252.4	22261.2
	526.3	24654.9	25695.2	24851.7	24443.5	26103.5			526.3	21732.8	22472.8	21748.7	21732.8	22488.8			526.3	22036.8	22043	22038.7	22036.8	22044.9
	526.2	24861.1	25639.1	24837	24443.3	26032.9			526.2	21940.7	22649.3	21953.5	21940.7	22662			526.2	22053	22058.6	22054.8	22053	22060.4
	526.1	24737.8	25587	24823.2	24443.1	25967			526.1	21713.8	22392.8	21724.2	21713.8	22403.1			526.1	21936.3	21941.5	21937.9	21936.3	21943.1
	526	24624.8	25538.6	24810.1	24443.1	25905.6			526	21579.8	22231.2	21588.6	21579.8	22240.1			526	21927.6	21932.3	21929.1	21927.6	21933.9
	525.9	24854.4	25493	24797.6	24442.9	25847.7			525.9	21443.1	22068.6	21450.7	21443.1	22076.2			525.9	21992.6	21996.9	21994	21992.6	21998.4
	525.8	24670.7	25450.3	24785.8	24442.8	25793.3			525.8	21254.5	21855.5	21261.2	21254.5	21862.2			525.8	22100.6	22104.6	22101.9	22100.6	22105.9
	525.7	25038.7	25410	24774.4	24442.5	25741.9			525.7	21729.4	22307.5	21735.4	21729.4	22313.5			525.7	22009.9	22013.6	22011.2	22009.9	22014.9
	525.6	24633.7	25372.3	24763.7	24442.4	25693.6			525.6	21613.9	22170.4	21619.3	21613.9	22175.8			525.6	22047	22050.4	22048.2	22047	22051.6
	525.5	24435.9	25337.1	24753.6	24442.4	25648.3			525.5	21512.6	22048.6	21517.5	21512.6	22053.5			525.5	21936.5	21939.7	21937.6	21936.5	21940.8
	525.4	24407.8	25303.8	24744.1	24442.4	25605.5			525.4	21375.9	21892.6	21380.4	21375.9	21897.1			525.4	21874.6	21877.5	21875.7	21874.6	21878.6
	525.3	24276	25272.3	24734.8	24442.3	25564.8			525.3	21449.4	21947.9	21453.5	21449.4	21952			525.3	21997.9	22000.6	21998.9	21997.9	22001.6
	525.2	24577.5	25242.4	24726.1	24442.2	25526.3			525.2	21712.5	22193.7	21716.3	21712.5	22197.5			525.2	21945.5	21948	21946.4	21945.5	21949
	525.1	24473.2	25245.2	24748.7	24473.2	25520.7			525.1	21792.6	22257.4	21796.1	21792.6	22260.9			525.1	22028.9	22031.3	22029.8	22028.9	22032.1
	525	24724.2	25469.6	24991.8	24724.2	25737.2			525	21487.6	21936.9	21490.8	21487.6	21940.1			525	22096.9	22099.1	22097.7	22096.9	22099.9
																																										--
																																										--
																																										--
																																										--
																																										--

## Sheet: Fig. 3a
	1000 mM KCl
	V_g (V)	1	0	-1.5	-2
	V_ds (V)	I_ds (A)	I_ds (A)	I_ds (A)	I_ds (A)
	-1	-1.62298e-06	-3.97226e-06	-7.99648e-06	-6.23423e-06
	-0.975	-1.58219e-06	-3.87365e-06	-7.61285e-06	-5.6671e-06
	-0.95	-1.54085e-06	-3.72018e-06	-7.24046e-06	-5.14301e-06
	-0.925	-1.49777e-06	-3.51941e-06	-6.89155e-06	-4.65408e-06
	-0.9	-1.46208e-06	-3.39238e-06	-6.5499e-06	-4.15019e-06
	-0.875	-1.42261e-06	-3.2763e-06	-6.22011e-06	-3.66167e-06
	-0.85	-1.38358e-06	-3.15258e-06	-5.89792e-06	-3.18867e-06
	-0.825	-1.345e-06	-3.03671e-06	-5.56583e-06	-2.7062e-06
	-0.8	-1.30746e-06	-2.87467e-06	-5.25398e-06	-2.23056e-06
	-0.775	-1.26364e-06	-2.74452e-06	-4.94749e-06	-1.77361e-06
	-0.75	-1.22446e-06	-2.66207e-06	-4.64739e-06	-1.29158e-06
	-0.725	-1.18361e-06	-2.52201e-06	-4.35207e-06	-8.36543e-07
	-0.7	-1.1447e-06	-2.4362e-06	-4.06461e-06	-3.53287e-07
	-0.675	-1.10545e-06	-2.31603e-06	-3.77723e-06	1.26302e-07
	-0.65	-1.06615e-06	-2.21307e-06	-3.49394e-06	6.05082e-07
	-0.625	-1.02718e-06	-2.13816e-06	-3.22015e-06	1.06441e-06
	-0.6	-9.86932e-07	-1.98351e-06	-2.94332e-06	1.55836e-06
	-0.575	-9.47703e-07	-1.90096e-06	-2.6703e-06	2.04589e-06
	-0.55	-9.08232e-07	-1.77774e-06	-2.40727e-06	2.53443e-06
	-0.525	-8.68384e-07	-1.66582e-06	-2.13928e-06	3.02411e-06
	-0.5	-8.29689e-07	-1.56417e-06	-1.87411e-06	3.51715e-06
	-0.475	-7.90369e-07	-1.44166e-06	-1.61682e-06	4.00382e-06
	-0.45	-7.50553e-07	-1.35827e-06	-1.35628e-06	4.50702e-06
	-0.425	-7.11891e-07	-1.23073e-06	-1.09869e-06	5.00831e-06
	-0.4	-6.72793e-07	-1.14049e-06	-8.65614e-07	5.50309e-06
	-0.375	-6.33732e-07	-1.02894e-06	-6.07064e-07	6.01635e-06
	-0.35	-5.9464e-07	-9.23445e-07	-3.52376e-07	6.52802e-06
	-0.325	-5.56391e-07	-8.20566e-07	-1.05968e-07	7.03299e-06
	-0.3	-5.1849e-07	-7.17012e-07	1.4457e-07	7.55498e-06
	-0.275	-4.78993e-07	-6.09996e-07	3.93371e-07	8.07597e-06
	-0.25	-4.39589e-07	-5.13133e-07	6.34143e-07	8.58767e-06
	-0.225	-4.01089e-07	-4.04913e-07	8.78356e-07	9.12419e-06
	-0.2	-3.62171e-07	-3.07255e-07	1.10545e-06	9.65615e-06
	-0.175	-3.23616e-07	-1.98808e-07	1.35152e-06	1.01909e-05
	-0.15	-2.84641e-07	-9.87428e-08	1.6025e-06	1.07362e-05
	-0.125	-2.46062e-07	4.48669e-09	1.85383e-06	1.12806e-05
	-0.1	-2.07501e-07	1.0629e-07	2.10039e-06	1.18296e-05
	-0.075	-1.687e-07	2.15097e-07	2.35431e-06	1.23814e-05
	-0.05	-1.30219e-07	3.20827e-07	2.6093e-06	1.29341e-05
	-0.025	-9.1741e-08	4.1958e-07	2.85939e-06	1.34977e-05
	0	-5.26312e-08	5.26693e-07	3.11677e-06	1.40627e-05
	0.025	-1.4161e-08	6.32835e-07	3.37505e-06	1.46302e-05
	0.05	2.42251e-08	7.35659e-07	3.6296e-06	1.52085e-05
	0.075	6.28798e-08	8.38386e-07	3.89176e-06	1.57868e-05
	0.1	1.01058e-07	9.48873e-07	4.15566e-06	1.63684e-05
	0.125	1.40015e-07	1.05521e-06	4.41745e-06	1.69548e-05
	0.15	1.78302e-07	1.16391e-06	4.68127e-06	1.75459e-05
	0.175	2.16775e-07	1.27918e-06	4.95463e-06	1.81413e-05
	0.2	2.55072e-07	1.39634e-06	5.22688e-06	1.87435e-05
	0.225	2.93656e-07	1.50619e-06	5.49356e-06	1.93484e-05
	0.25	3.31828e-07	1.62644e-06	5.7799e-06	1.99594e-05
	0.275	3.70251e-07	1.74975e-06	6.06357e-06	2.05701e-05
	0.3	4.08512e-07	1.87418e-06	6.3436e-06	2.11896e-05
	0.325	4.46746e-07	2.00227e-06	6.63289e-06	2.18132e-05
	0.35	4.84986e-07	2.13013e-06	6.92937e-06	2.24411e-05
	0.375	5.23279e-07	2.26246e-06	7.22931e-06	2.30672e-05
	0.4	5.61573e-07	2.39544e-06	7.53e-06	2.37042e-05
	0.425	5.99826e-07	2.52984e-06	7.8358e-06	2.43428e-05
	0.45	6.3806e-07	2.66604e-06	8.14428e-06	2.49794e-05
	0.475	6.76154e-07	2.80704e-06	8.45445e-06	2.56259e-05
	0.5	7.14636e-07	2.95025e-06	8.76821e-06	2.62725e-05
	0.525	7.52612e-07	3.13196e-06	9.0862e-06	2.69247e-05
	0.55	7.90949e-07	3.27962e-06	9.40698e-06	2.75834e-05
	0.575	8.28995e-07	3.44451e-06	9.72973e-06	2.8243e-05
	0.6	8.6739e-07	3.5982e-06	1.00621e-05	2.89054e-05
	0.625	9.05514e-07	3.72198e-06	1.03947e-05	2.95737e-05
	0.65	9.43694e-07	3.89524e-06	1.07277e-05	3.01907e-05
	0.675	9.82278e-07	4.08603e-06	1.10626e-05	3.08554e-05
	0.7	1.02019e-06	4.25461e-06	1.14007e-05	3.15334e-05
	0.725	1.05864e-06	4.42348e-06	1.17409e-05	3.22718e-05
	0.75	1.09669e-06	4.57371e-06	1.2083e-05	3.29533e-05
	0.775	1.13518e-06	4.74247e-06	1.24306e-05	3.36427e-05
	0.8	1.1733e-06	4.9266e-06	1.27795e-05	3.43312e-05
	0.825	1.21177e-06	5.07475e-06	1.3131e-05	3.50182e-05
	0.85	1.24995e-06	5.2533e-06	1.34861e-05	3.57148e-05
	0.875	1.28827e-06	5.378e-06	1.3844e-05	3.64083e-05
	0.9	1.32655e-06	5.50451e-06	1.42038e-05	3.71086e-05
	0.925	1.36509e-06	5.6673e-06	1.45684e-05	3.7825e-05
	0.95	1.4032e-06	5.80976e-06	1.49335e-05	3.85249e-05
	0.975	1.44192e-06	5.97322e-06	1.53015e-05	3.92288e-05
	1	1.48025e-06	6.13159e-06	1.56741e-05	3.99648e-05
	1	1.47969e-06	6.13902e-06	1.57006e-05	4.0003e-05
	0.975	1.44073e-06	5.97986e-06	1.53769e-05	3.93662e-05
	0.95	1.40174e-06	5.83979e-06	1.50584e-05	3.87306e-05
	0.925	1.36293e-06	5.67152e-06	1.47396e-05	3.81003e-05
	0.9	1.32417e-06	5.51472e-06	1.44154e-05	3.74435e-05
	0.875	1.28571e-06	5.36444e-06	1.40942e-05	3.68049e-05
	0.85	1.24688e-06	5.20505e-06	1.37729e-05	3.61563e-05
	0.825	1.20855e-06	5.03025e-06	1.34477e-05	3.55088e-05
	0.8	1.16987e-06	4.87109e-06	1.3123e-05	3.48619e-05
	0.775	1.1316e-06	4.72301e-06	1.27981e-05	3.42108e-05
	0.75	1.09294e-06	4.5653e-06	1.24699e-05	3.35641e-05
	0.725	1.0548e-06	4.40975e-06	1.21438e-05	3.29208e-05
	0.7	1.01619e-06	4.24863e-06	1.18179e-05	3.22715e-05
	0.675	9.78192e-07	4.08893e-06	1.14891e-05	3.16223e-05
	0.65	9.39511e-07	3.93184e-06	1.11626e-05	3.0957e-05
	0.625	9.0123e-07	3.77056e-06	1.08406e-05	3.03151e-05
	0.6	8.62819e-07	3.60634e-06	1.05176e-05	2.96787e-05
	0.575	8.24576e-07	3.4618e-06	1.01889e-05	2.90337e-05
	0.55	7.86481e-07	3.29828e-06	9.86122e-06	2.83855e-05
	0.525	7.47899e-07	3.13256e-06	9.53412e-06	2.77374e-05
	0.5	7.09816e-07	2.97271e-06	9.20631e-06	2.70925e-05
	0.475	6.71211e-07	2.8025e-06	8.87946e-06	2.64473e-05
	0.45	6.33159e-07	2.64918e-06	8.55536e-06	2.58057e-05
	0.425	5.94267e-07	2.49205e-06	8.23071e-06	2.51641e-05
	0.4	5.56373e-07	2.33134e-06	7.90734e-06	2.45246e-05
	0.375	5.18161e-07	2.17856e-06	7.58584e-06	2.38876e-05
	0.35	4.79769e-07	2.01964e-06	7.26364e-06	2.3254e-05
	0.325	4.41567e-07	1.86854e-06	6.94267e-06	2.26211e-05
	0.3	4.03327e-07	1.71629e-06	6.62592e-06	2.19918e-05
	0.275	3.64981e-07	1.56374e-06	6.30591e-06	2.13667e-05
	0.25	3.26834e-07	1.41515e-06	5.98824e-06	2.07415e-05
	0.225	2.88288e-07	1.27005e-06	5.67267e-06	2.01208e-05
	0.2	2.5028e-07	1.12851e-06	5.35633e-06	1.95035e-05
	0.175	2.11715e-07	9.93887e-07	5.04174e-06	1.88882e-05
	0.15	1.73616e-07	8.55542e-07	4.72961e-06	1.82777e-05
	0.125	1.35232e-07	7.18489e-07	4.4188e-06	1.76734e-05
	0.1	9.71188e-08	5.76474e-07	4.10626e-06	1.7066e-05
	0.075	5.86239e-08	4.36138e-07	3.797e-06	1.6466e-05
	0.05	2.02013e-08	2.84406e-07	3.49059e-06	1.58712e-05
	0.025	-1.8154e-08	1.31727e-07	3.18038e-06	1.52742e-05
	0	-5.66367e-08	-3.05603e-08	2.87529e-06	1.46841e-05
	-0.025	-9.4924e-08	-1.7507e-07	2.57263e-06	1.40997e-05
	-0.05	-1.33163e-07	-3.23487e-07	2.2657e-06	1.35132e-05
	-0.075	-1.71744e-07	-4.73377e-07	1.96356e-06	1.29328e-05
	-0.1	-2.10544e-07	-6.31749e-07	1.66472e-06	1.2364e-05
	-0.125	-2.49043e-07	-7.84056e-07	1.36136e-06	1.17828e-05
	-0.15	-2.87402e-07	-9.28382e-07	1.0632e-06	1.12118e-05
	-0.175	-3.26395e-07	-1.05571e-06	7.78341e-07	1.06459e-05
	-0.2	-3.6466e-07	-1.19833e-06	4.74904e-07	1.00826e-05
	-0.225	-4.03322e-07	-1.33892e-06	1.79227e-07	9.52405e-06
	-0.25	-4.41898e-07	-1.46196e-06	-1.17121e-07	8.96104e-06
	-0.275	-4.80325e-07	-1.58707e-06	-4.11059e-07	8.4061e-06
	-0.3	-5.19226e-07	-1.70741e-06	-7.00409e-07	7.85523e-06
	-0.325	-5.57866e-07	-1.81601e-06	-9.91274e-07	7.30738e-06
	-0.35	-5.96775e-07	-1.9286e-06	-1.26651e-06	6.76215e-06
	-0.375	-6.35742e-07	-2.04052e-06	-1.55581e-06	6.2197e-06
	-0.4	-6.74315e-07	-2.15388e-06	-1.8437e-06	5.68105e-06
	-0.425	-7.13546e-07	-2.25048e-06	-2.12866e-06	5.14448e-06
	-0.45	-7.52867e-07	-2.37134e-06	-2.40817e-06	4.61982e-06
	-0.475	-7.92044e-07	-2.45268e-06	-2.69066e-06	4.08275e-06
	-0.5	-8.31275e-07	-2.54493e-06	-2.97084e-06	3.5536e-06
	-0.525	-8.70343e-07	-2.62913e-06	-3.24014e-06	3.03848e-06
	-0.55	-9.09702e-07	-2.69667e-06	-3.48278e-06	2.50854e-06
	-0.575	-9.49296e-07	-2.81356e-06	-3.74998e-06	1.98647e-06
	-0.6	-9.88834e-07	-2.87527e-06	-4.02829e-06	1.4817e-06
	-0.625	-1.02676e-06	-2.94921e-06	-4.27659e-06	9.74527e-07
	-0.65	-1.06561e-06	-3.02063e-06	-4.55438e-06	4.51283e-07
	-0.675	-1.10265e-06	-3.11643e-06	-4.82142e-06	-3.61171e-08
	-0.7	-1.14163e-06	-3.13812e-06	-5.07979e-06	-5.39148e-07
	-0.725	-1.18262e-06	-3.22096e-06	-5.34789e-06	-1.0294e-06
	-0.75	-1.2227e-06	-3.29657e-06	-5.60645e-06	-1.54794e-06
	-0.775	-1.26146e-06	-3.39437e-06	-5.86266e-06	-2.04871e-06
	-0.8	-1.29961e-06	-3.47502e-06	-6.12308e-06	-2.54093e-06
	-0.825	-1.33906e-06	-3.55785e-06	-6.37292e-06	-3.03146e-06
	-0.85	-1.37799e-06	-3.63225e-06	-6.62126e-06	-3.51896e-06
	-0.875	-1.41782e-06	-3.69366e-06	-6.86458e-06	-3.99857e-06
	-0.9	-1.45722e-06	-3.78782e-06	-7.11619e-06	-4.47958e-06
	-0.925	-1.49651e-06	-3.89406e-06	-7.35574e-06	-4.95526e-06
	-0.95	-1.53587e-06	-4.03591e-06	-7.59263e-06	-5.3969e-06
	-0.975	-1.57825e-06	-4.03695e-06	-7.83629e-06	-5.87959e-06
	-1	-1.6167e-06	-4.10918e-06	-8.06796e-06	-6.35045e-06

## Sheet: Fig. 3b
		1 mM KCl		10 mM KCl		100 mM KCl		1000 mM KCl
	V_g (V)	Conductance (S)	error (SE)	Conductance (S)	error (SE)	Conductance (S)	error (SE)	Conductance (S)	error (SE)
	1	5.17517e-07	1.20969e-07	6.75541e-07	1.74626e-07	9.73577e-07	1.82106e-07	1.5299e-06	1.24073e-07
	0.5	7.67819e-07	3.2216e-08	8.24553e-07	1.47011e-07	1.45044e-06	5.40865e-07	2.38427e-06	4.76835e-07
	0	1.21748e-06	1.77001e-07	1.90742e-06	1.19235e-07	2.50348e-06	4.1295e-07	4.17247e-06	9.00058e-07
	-0.5	1.17189e-06	3.40915e-08	1.94715e-06	3.44153e-07	2.58294e-06	7.75649e-07	4.72878e-06	8.94777e-07
	-1	1.25569e-06	6.56194e-08	2.20544e-06	3.09737e-07	3.05982e-06	9.56202e-07	4.6096e-06	6.88259e-07
	-1.5	1.59016e-06	2.2523e-07	2.86111e-06	6.19433e-07	5.80169e-06	1.07509e-06	1.08086e-05	7.28379e-07
	-2	3.61582e-06	3.43879e-07	8.34494e-06	1.23896e-06	1.22392e-05	2.25344e-06	2.09815e-05	2.5232e-06

## Sheet: Fig. 3c
	KCl (mM)	Gating ON/OFF ratio (%)	Error (SE)(%)
	1	615.19	108.72
	10	1163.97	167.255
	100	1162.83	118.089
	1000	1272.32	143.737

## Sheet: Fig. 3d
	1000 mM KCl
	V_g (V)	1	0	-1	-2
	1000/T (1/K)	ln(G(S))	ln(G(S))	ln(G(S))	ln(G(S))
	3.3557	-13.2682	-12.416	-11.9534	-10.8672
	3.30033	-13.052	-12.2047	-11.848	-10.7719
	3.24675	-12.8978	-12.0711	-11.7228	-10.644
	3.19489	-12.7235	-11.8819	-11.465	-10.4956
	3.14465	-12.5751	-11.6657	-11.3372	-10.174
	3.09598	-12.416	-11.5603	-11.161	-10.0343
	3.04878	-12.1137	-11.378	-10.9326	-9.95089
	3.003	-11.9911	-11.1549	-10.7655	-9.73579
		--

## Sheet: Fig. 4a
	1000 mM Cl, CaCl2
	V_g (V)	1	0	-1	-2
	V_ds (V)	I_ds (A)	I_ds (A)	I_ds (A)	I_ds (A)
	-1	-5.98423e-07	-1.83127e-06	-2.88087e-06	-2.16562e-07
	-0.975	-5.85846e-07	-1.78516e-06	-2.8062e-06	-2.01911e-07
	-0.95	-5.7327e-07	-1.73905e-06	-2.73153e-06	-1.87261e-07
	-0.925	-5.60693e-07	-1.69294e-06	-2.65686e-06	-1.7261e-07
	-0.9	-5.48117e-07	-1.64682e-06	-2.58219e-06	-1.57959e-07
	-0.875	-5.3554e-07	-1.60071e-06	-2.50752e-06	-1.43309e-07
	-0.85	-5.22964e-07	-1.5546e-06	-2.43284e-06	-1.28658e-07
	-0.825	-5.10387e-07	-1.50849e-06	-2.35817e-06	-1.14008e-07
	-0.8	-4.97811e-07	-1.46238e-06	-2.2835e-06	-9.93571e-08
	-0.775	-4.85235e-07	-1.41627e-06	-2.20883e-06	-8.47066e-08
	-0.75	-4.72658e-07	-1.37016e-06	-2.13416e-06	-7.0056e-08
	-0.725	-4.60082e-07	-1.32405e-06	-2.05949e-06	-5.54055e-08
	-0.7	-4.47505e-07	-1.27794e-06	-1.98482e-06	-4.07549e-08
	-0.675	-4.34929e-07	-1.23182e-06	-1.91015e-06	-2.61043e-08
	-0.65	-4.22352e-07	-1.18571e-06	-1.83548e-06	-1.14538e-08
	-0.625	-4.09776e-07	-1.1396e-06	-1.76081e-06	3.1968e-09
	-0.6	-3.972e-07	-1.09349e-06	-1.68614e-06	1.78474e-08
	-0.575	-3.84623e-07	-1.04738e-06	-1.61147e-06	3.24979e-08
	-0.55	-3.72047e-07	-1.00127e-06	-1.5368e-06	4.71485e-08
	-0.525	-3.5947e-07	-9.55158e-07	-1.46213e-06	6.17991e-08
	-0.5	-3.46894e-07	-9.09047e-07	-1.38745e-06	7.64496e-08
	-0.475	-3.34317e-07	-8.62936e-07	-1.31278e-06	9.11002e-08
	-0.45	-3.21741e-07	-8.16824e-07	-1.23811e-06	1.05751e-07
	-0.425	-3.09165e-07	-7.70713e-07	-1.16344e-06	1.20401e-07
	-0.4	-2.96588e-07	-7.24602e-07	-1.08877e-06	1.35052e-07
	-0.375	-2.84012e-07	-6.78491e-07	-1.0141e-06	1.49702e-07
	-0.35	-2.71435e-07	-6.3238e-07	-9.3943e-07	1.64353e-07
	-0.325	-2.58859e-07	-5.86269e-07	-8.64759e-07	1.79004e-07
	-0.3	-2.46282e-07	-5.40158e-07	-7.90089e-07	1.93654e-07
	-0.275	-2.33706e-07	-4.94046e-07	-7.15418e-07	2.08305e-07
	-0.25	-2.21129e-07	-4.47935e-07	-6.40747e-07	2.22955e-07
	-0.225	-2.08553e-07	-4.01824e-07	-5.66076e-07	2.37606e-07
	-0.2	-1.95977e-07	-3.55713e-07	-4.91406e-07	2.52256e-07
	-0.175	-1.834e-07	-3.09602e-07	-4.16735e-07	2.66907e-07
	-0.15	-1.70824e-07	-2.63491e-07	-3.42064e-07	2.81557e-07
	-0.125	-1.58247e-07	-2.1738e-07	-2.67394e-07	2.96208e-07
	-0.1	-1.45671e-07	-1.71268e-07	-1.92723e-07	3.10859e-07
	-0.075	-1.33094e-07	-1.25157e-07	-1.18052e-07	3.25509e-07
	-0.05	-1.20518e-07	-7.90461e-08	-4.33813e-08	3.4016e-07
	-0.025	-1.07942e-07	-3.2935e-08	3.12894e-08	3.5481e-07
	0	-9.53651e-08	1.31762e-08	1.0596e-07	3.69461e-07
	0.025	-8.27887e-08	5.92873e-08	1.80631e-07	3.84111e-07
	0.05	-7.02123e-08	1.05398e-07	2.55302e-07	3.98762e-07
	0.075	-5.76358e-08	1.5151e-07	3.29972e-07	4.13413e-07
	0.1	-4.50594e-08	1.97621e-07	4.04643e-07	4.28063e-07
	0.125	-3.24829e-08	2.43732e-07	4.79314e-07	4.42714e-07
	0.15	-1.99065e-08	2.89843e-07	5.53984e-07	4.57364e-07
	0.175	-7.33008e-09	3.35954e-07	6.28655e-07	4.72015e-07
	0.2	5.24636e-09	3.82065e-07	7.03326e-07	4.86665e-07
	0.225	1.78228e-08	4.28176e-07	7.77997e-07	5.01316e-07
	0.25	3.03992e-08	4.74288e-07	8.52667e-07	5.15967e-07
	0.275	4.29757e-08	5.20399e-07	9.27338e-07	5.30617e-07
	0.3	5.55521e-08	5.6651e-07	1.00201e-06	5.45268e-07
	0.325	6.81285e-08	6.12621e-07	1.07668e-06	5.59918e-07
	0.35	8.0705e-08	6.58732e-07	1.15135e-06	5.74569e-07
	0.375	9.32814e-08	7.04843e-07	1.22602e-06	5.89219e-07
	0.4	1.05858e-07	7.50954e-07	1.30069e-06	6.0387e-07
	0.425	1.18434e-07	7.97066e-07	1.37536e-06	6.1852e-07
	0.45	1.31011e-07	8.43177e-07	1.45003e-06	6.33171e-07
	0.475	1.43587e-07	8.89288e-07	1.5247e-06	6.47822e-07
	0.5	1.56164e-07	9.35399e-07	1.59937e-06	6.62472e-07
	0.525	1.6874e-07	9.8151e-07	1.67405e-06	6.77123e-07
	0.55	1.81316e-07	1.02762e-06	1.74872e-06	6.91773e-07
	0.575	1.93893e-07	1.07373e-06	1.82339e-06	7.06424e-07
	0.6	2.06469e-07	1.11984e-06	1.89806e-06	7.21074e-07
	0.625	2.19046e-07	1.16595e-06	1.97273e-06	7.35725e-07
	0.65	2.31622e-07	1.21207e-06	2.0474e-06	7.50376e-07
	0.675	2.44199e-07	1.25818e-06	2.12207e-06	7.65026e-07
	0.7	2.56775e-07	1.30429e-06	2.19674e-06	7.79677e-07
	0.725	2.69351e-07	1.3504e-06	2.27141e-06	7.94327e-07
	0.75	2.81928e-07	1.39651e-06	2.34608e-06	8.08978e-07
	0.775	2.94504e-07	1.44262e-06	2.42075e-06	8.23628e-07
	0.8	3.07081e-07	1.48873e-06	2.49542e-06	8.38279e-07
	0.825	3.19657e-07	1.53484e-06	2.57009e-06	8.52929e-07
	0.85	3.32234e-07	1.58096e-06	2.64476e-06	8.6758e-07
	0.875	3.4481e-07	1.62707e-06	2.71944e-06	8.82231e-07
	0.9	3.57387e-07	1.67318e-06	2.79411e-06	8.96881e-07
	0.925	3.69963e-07	1.71929e-06	2.86878e-06	9.11532e-07
	0.95	3.82539e-07	1.7654e-06	2.94345e-06	9.26182e-07
	0.975	3.95116e-07	1.81151e-06	3.01812e-06	9.40833e-07
	1	4.07692e-07	1.85762e-06	3.09279e-06	9.55483e-07

## Sheet: Fig. 4b
		1 mM Cl, CaCl2		100 mM Cl, CaCl2		1000 mM Cl, CaCl2
	V_g (V)	Conductance (S)	Error (SE)	Conductance (S)	Error (SE)	Conductance (S)	Error (SE)
	1	8.42103e-07	6.43839e-09	1.03588e-06	6.11746e-10	5.03752e-07	2.45306e-09
	0.5	8.12334e-07	2.40874e-09	1.15824e-06	3.06843e-09	7.92347e-07	1.00802e-08
	0	8.43335e-07	4.17092e-09	1.6974e-06	6.48704e-09	1.83929e-06	5.23647e-09
	-0.5	1.61821e-06	1.64722e-08	2.09693e-06	1.86478e-08	2.903e-06	1.24461e-08
	-1	1.52206e-06	9.25661e-09	2.45079e-06	7.67291e-09	2.96762e-06	1.99856e-08
	-1.5	1.00024e-06	4.07629e-09	1.67952e-06	7.66695e-09	1.45189e-06	9.08373e-09
	-2	7.3576e-07	5.90484e-09	8.27603e-07	9.82494e-10	5.83931e-07	2.16376e-09

## Sheet: Fig. 4c
	1000 mM Cl, AlCl3
	V_g (V)	1	0	-1	-2
	V_ds (V)	I_ds (A)	I_ds (A)	I_ds (A)	I_ds (A)
	-1	-2.49296e-07	-8.15818e-07	-1.77832e-07	-1.46204e-07
	-0.975	-2.44704e-07	-7.95766e-07	-1.717e-07	-1.40936e-07
	-0.95	-2.40112e-07	-7.75715e-07	-1.65567e-07	-1.35668e-07
	-0.925	-2.35519e-07	-7.55663e-07	-1.59435e-07	-1.304e-07
	-0.9	-2.30927e-07	-7.35611e-07	-1.53302e-07	-1.25132e-07
	-0.875	-2.26335e-07	-7.1556e-07	-1.4717e-07	-1.19864e-07
	-0.85	-2.21742e-07	-6.95508e-07	-1.41037e-07	-1.14596e-07
	-0.825	-2.1715e-07	-6.75456e-07	-1.34905e-07	-1.09328e-07
	-0.8	-2.12558e-07	-6.55405e-07	-1.28772e-07	-1.0406e-07
	-0.775	-2.07965e-07	-6.35353e-07	-1.2264e-07	-9.87917e-08
	-0.75	-2.03373e-07	-6.15301e-07	-1.16507e-07	-9.35237e-08
	-0.725	-1.98781e-07	-5.9525e-07	-1.10375e-07	-8.82556e-08
	-0.7	-1.94189e-07	-5.75198e-07	-1.04242e-07	-8.29876e-08
	-0.675	-1.89596e-07	-5.55146e-07	-9.811e-08	-7.77196e-08
	-0.65	-1.85004e-07	-5.35094e-07	-9.19775e-08	-7.24515e-08
	-0.625	-1.80412e-07	-5.15043e-07	-8.58451e-08	-6.71835e-08
	-0.6	-1.75819e-07	-4.94991e-07	-7.97126e-08	-6.19155e-08
	-0.575	-1.71227e-07	-4.74939e-07	-7.35801e-08	-5.66474e-08
	-0.55	-1.66635e-07	-4.54888e-07	-6.74477e-08	-5.13794e-08
	-0.525	-1.62042e-07	-4.34836e-07	-6.13152e-08	-4.61114e-08
	-0.5	-1.5745e-07	-4.14784e-07	-5.51827e-08	-4.08433e-08
	-0.475	-1.52858e-07	-3.94733e-07	-4.90503e-08	-3.55753e-08
	-0.45	-1.48265e-07	-3.74681e-07	-4.29178e-08	-3.03073e-08
	-0.425	-1.43673e-07	-3.54629e-07	-3.67853e-08	-2.50392e-08
	-0.4	-1.39081e-07	-3.34578e-07	-3.06529e-08	-1.97712e-08
	-0.375	-1.34489e-07	-3.14526e-07	-2.45204e-08	-1.45032e-08
	-0.35	-1.29896e-07	-2.94474e-07	-1.83879e-08	-9.23515e-09
	-0.325	-1.25304e-07	-2.74423e-07	-1.22555e-08	-3.96712e-09
	-0.3	-1.20712e-07	-2.54371e-07	-6.123e-09	1.30091e-09
	-0.275	-1.16119e-07	-2.34319e-07	9.47067e-12	6.56894e-09
	-0.25	-1.11527e-07	-2.14268e-07	6.14194e-09	1.1837e-08
	-0.225	-1.06935e-07	-1.94216e-07	1.22744e-08	1.7105e-08
	-0.2	-1.02342e-07	-1.74164e-07	1.84069e-08	2.2373e-08
	-0.175	-9.77501e-08	-1.54113e-07	2.45393e-08	2.76411e-08
	-0.15	-9.31578e-08	-1.34061e-07	3.06718e-08	3.29091e-08
	-0.125	-8.85655e-08	-1.14009e-07	3.68043e-08	3.81771e-08
	-0.1	-8.39732e-08	-9.39575e-08	4.29367e-08	4.34452e-08
	-0.075	-7.93809e-08	-7.39058e-08	4.90692e-08	4.87132e-08
	-0.05	-7.47886e-08	-5.38541e-08	5.52017e-08	5.39812e-08
	-0.025	-7.01963e-08	-3.38024e-08	6.13341e-08	5.92493e-08
	0	-6.5604e-08	-1.37507e-08	6.74666e-08	6.45173e-08
	0.025	-6.10117e-08	6.30096e-09	7.35991e-08	6.97853e-08
	0.05	-5.64194e-08	2.63526e-08	7.97315e-08	7.50534e-08
	0.075	-5.18271e-08	4.64043e-08	8.5864e-08	8.03214e-08
	0.1	-4.72348e-08	6.6456e-08	9.19965e-08	8.55894e-08
	0.125	-4.26425e-08	8.65077e-08	9.81289e-08	9.08575e-08
	0.15	-3.80502e-08	1.06559e-07	1.04261e-07	9.61255e-08
	0.175	-3.34579e-08	1.26611e-07	1.10394e-07	1.01394e-07
	0.2	-2.88656e-08	1.46663e-07	1.16526e-07	1.06662e-07
	0.225	-2.42733e-08	1.66714e-07	1.22659e-07	1.1193e-07
	0.25	-1.9681e-08	1.86766e-07	1.28791e-07	1.17198e-07
	0.275	-1.50887e-08	2.06818e-07	1.34924e-07	1.22466e-07
	0.3	-1.04964e-08	2.26869e-07	1.41056e-07	1.27734e-07
	0.325	-5.90407e-09	2.46921e-07	1.47189e-07	1.33002e-07
	0.35	-1.31176e-09	2.66973e-07	1.53321e-07	1.3827e-07
	0.375	3.28054e-09	2.87025e-07	1.59454e-07	1.43538e-07
	0.4	7.87284e-09	3.07076e-07	1.65586e-07	1.48806e-07
	0.425	1.24651e-08	3.27128e-07	1.71719e-07	1.54074e-07
	0.45	1.70575e-08	3.4718e-07	1.77851e-07	1.59342e-07
	0.475	2.16498e-08	3.67231e-07	1.83983e-07	1.6461e-07
	0.5	2.62421e-08	3.87283e-07	1.90116e-07	1.69878e-07
	0.525	3.08344e-08	4.07335e-07	1.96248e-07	1.75146e-07
	0.55	3.54267e-08	4.27386e-07	2.02381e-07	1.80414e-07
	0.575	4.0019e-08	4.47438e-07	2.08513e-07	1.85682e-07
	0.6	4.46113e-08	4.6749e-07	2.14646e-07	1.9095e-07
	0.625	4.92036e-08	4.87541e-07	2.20778e-07	1.96218e-07
	0.65	5.37959e-08	5.07593e-07	2.26911e-07	2.01486e-07
	0.675	5.83882e-08	5.27645e-07	2.33043e-07	2.06754e-07
	0.7	6.29805e-08	5.47696e-07	2.39176e-07	2.12022e-07
	0.725	6.75728e-08	5.67748e-07	2.45308e-07	2.1729e-07
	0.75	7.21651e-08	5.878e-07	2.51441e-07	2.22558e-07
	0.775	7.67574e-08	6.07851e-07	2.57573e-07	2.27826e-07
	0.8	8.13497e-08	6.27903e-07	2.63706e-07	2.33094e-07
	0.825	8.5942e-08	6.47955e-07	2.69838e-07	2.38362e-07
	0.85	9.05343e-08	6.68007e-07	2.7597e-07	2.4363e-07
	0.875	9.51266e-08	6.88058e-07	2.82103e-07	2.48898e-07
	0.9	9.97189e-08	7.0811e-07	2.88235e-07	2.54166e-07
	0.925	1.04311e-07	7.28162e-07	2.94368e-07	2.59434e-07
	0.95	1.08904e-07	7.48213e-07	3.005e-07	2.64702e-07
	0.975	1.13496e-07	7.68265e-07	3.06633e-07	2.69971e-07
	1	1.18088e-07	7.88317e-07	3.12765e-07	2.75239e-07

## Sheet: Fig. 4d
		1 mM Cl, AlCl3		100 mM Cl, AlCl3		1000 mM Cl, AlCl3
	V_g (V)	Conductance (S)	Error (SE)	Conductance (S)	Error (SE)	Conductance (S)	Error (SE)
	1	1.30774e-07	4.80963e-10	1.70826e-07	2.12982e-10	1.81899e-07	1.82111e-09
	0.5	1.33011e-07	1.38569e-09	2.19585e-07	3.38027e-09	2.04887e-07	5.09766e-10
	0	4.33815e-07	2.2883e-09	6.46072e-07	5.55306e-09	8.21758e-07	2.1331e-08
	-0.5	2.49116e-07	2.89393e-09	3.25299e-07	1.75064e-08	4.14337e-07	5.12018e-08
	-1	1.9235e-07	1.72198e-09	2.1199e-07	9.43446e-10	2.45542e-07	2.38328e-09
	-1.5	1.24181e-07	4.87351e-10	1.19963e-07	7.36546e-11	2.19228e-07	9.59876e-10
	-2	8.34727e-08	7.54992e-11	1.10436e-07	1.04203e-10	2.1237e-07	1.30879e-09

## Sheet: Fig. 5c
1M KCl	σ	K+_current	Error (SE)
	C/m^2	pA	pA
	-0.458304	306.538	12.037
	-0.404386	283.583	6.55899
	-0.323509	197.957	10.7748
	-0.269591	153.337	5.6457
	-0.215672	107.122	5.98352
	-0.161754	65.0015	4.03442
	-0.107836	28.309	2.03757
	-0.0539181	1.24015	1.50223
	0	5.59394	1.2344
	0.0539181	1.14602	0.819748

[truncated: 35 more sheets: Fig. 5d, Fig. 5e, Fig. 5f, Fig. 5g, Fig. 5h, Supplementary Fig. 1a, Supplementary Fig. 1b, Supplementary Fig. 6, Supplementary Fig. 7, Supplementary Fig.8, Supplementary Fig. 9a, Supplementary Fig. 9b, Supplementary Fig. 9c, Supplementary Fig. 9d, Supplementary Fig. 10, Si 2p, Supplementary Fig. 10, Al 2p, Supplementary Fig. 10 Mg 2s, Supplementary Fig. 11a, Supplementary Fig. 11b, Supplementary Fig 12a …]
